# Supplementary material for: Reliable Diagnostics of SARS-CoV-2 Infections Using One- and Two-Gene Molecular Tests for a Viral RNA Detection—Results Questioning Previous Observations
Source: MDPI journal article supplement (doi:10.3390/diagnostics11101839), 2021-10-05

**Table S1.** Minimum Information for Publication of Quantitative Real-Time PCR Experiments

| EXPERIMENTAL DESIGN                                                         |                                                                                                                                                                                                                                                                                                                                                                                                                                                                                                               |
|-----------------------------------------------------------------------------|---------------------------------------------------------------------------------------------------------------------------------------------------------------------------------------------------------------------------------------------------------------------------------------------------------------------------------------------------------------------------------------------------------------------------------------------------------------------------------------------------------------|
| <b>Definition of experimental and control groups</b>                        | The tests were carried out on 306 nasopharyngeal/oropharyngeal swabs collected between September 2020 and January 2021 into dedicated viral transport media (VTM) of three companies (UTM Universal Transport Medium, Copan, Virus Transport and Preservation Medium, Biocomma® and Virus Sample Stabilizer, Vazyme), each in a volume of 3 ml. The specimens were isolated from different patients or health care workers (one sample per patient). All samples have been submitted for routine diagnostics. |
| <b>Number within each group</b>                                             | 306 nasopharyngeal/oropharyngeal swabs.                                                                                                                                                                                                                                                                                                                                                                                                                                                                       |
| <b>Assay carried out by core lab or investigator's lab?</b>                 | Investigator's lab.                                                                                                                                                                                                                                                                                                                                                                                                                                                                                           |
| <b>Acknowledgement of authors' contributions</b>                            | not applicable                                                                                                                                                                                                                                                                                                                                                                                                                                                                                                |
| SAMPLE                                                                      |                                                                                                                                                                                                                                                                                                                                                                                                                                                                                                               |
| <b>Description</b>                                                          |                                                                                                                                                                                                                                                                                                                                                                                                                                                                                                               |
| Volume/mass of sample processed                                             | BD MAX™ ExK™ TNA-3 (Becton Dickinson): 200 microliters<br>QIAamp Viral RNA Mini Kit (QIAGEN) and QIAcube Connect device (QIAGEN): 140 microliters.                                                                                                                                                                                                                                                                                                                                                            |
| Microdissection or macrodissection                                          | not applicable                                                                                                                                                                                                                                                                                                                                                                                                                                                                                                |
| <b>Processing procedure</b>                                                 |                                                                                                                                                                                                                                                                                                                                                                                                                                                                                                               |
| If frozen - how and how quickly?                                            | not applicable                                                                                                                                                                                                                                                                                                                                                                                                                                                                                                |
| If fixed - with what, how quickly?                                          | not applicable                                                                                                                                                                                                                                                                                                                                                                                                                                                                                                |
| <b>Sample storage conditions and duration (especially for FFPE samples)</b> | The clinical samples stored at 4°C for 1 to 3 hours, according to UTM manufacturer's recommendations were used afterwards for RNA isolation with BD MAX™ ExK™ TNA-3 (Becton Dickinson). The clinical samples stored no longer than overnight at 4°C, according to VTM manufacturer's recommendations were used afterwards for RNA isolation with QIAamp Viral RNA Mini Kit (QIAGEN) and QIAcube Connect device (QIAGEN).                                                                                      |
| NUCLEIC ACID EXTRACTION                                                     |                                                                                                                                                                                                                                                                                                                                                                                                                                                                                                               |
| <b>Procedure and/or instrumentation</b>                                     |                                                                                                                                                                                                                                                                                                                                                                                                                                                                                                               |
| Name of kit and details of any modifications                                | BD MAX™ ExK™ TNA-3 (Becton Dickinson) and QIAamp Viral RNA Mini Kit (QIAGEN).                                                                                                                                                                                                                                                                                                                                                                                                                                 |
| Source of additional reagents used                                          | not applicable                                                                                                                                                                                                                                                                                                                                                                                                                                                                                                |
| <b>Details of DNase or RNase treatment</b>                                  | not applicable                                                                                                                                                                                                                                                                                                                                                                                                                                                                                                |
| <b>Contamination assessment (DNA or RNA)</b>                                | Negative controls in each run, incompatible reactions between methods repeated.                                                                                                                                                                                                                                                                                                                                                                                                                               |
| <b>Nucleic acid quantification</b>                                          |                                                                                                                                                                                                                                                                                                                                                                                                                                                                                                               |
| Instrument and method                                                       | BD MAX™ system (Becton Dickinson) and QIAcube Connect device (QIAGEN).                                                                                                                                                                                                                                                                                                                                                                                                                                        |
| Purity (A260/A280)                                                          | not applicable                                                                                                                                                                                                                                                                                                                                                                                                                                                                                                |
| Yield                                                                       | not applicable                                                                                                                                                                                                                                                                                                                                                                                                                                                                                                |
| <b>RNA integrity method/instrument</b>                                      |                                                                                                                                                                                                                                                                                                                                                                                                                                                                                                               |
| RIN/RQI or Cq of 3' and 5' transcripts                                      | not applicable                                                                                                                                                                                                                                                                                                                                                                                                                                                                                                |
| Electrophoresis traces                                                      | not applicable                                                                                                                                                                                                                                                                                                                                                                                                                                                                                                |
| <b>Inhibition testing (Cq dilutions, spike or other)</b>                    | An inhibition of the PCR reaction excluded by the amplification of internal control.                                                                                                                                                                                                                                                                                                                                                                                                                          |

|                                                                  |                                                                                                                                                                                                                                                                                                                                                                                                                                                                                  |
|------------------------------------------------------------------|----------------------------------------------------------------------------------------------------------------------------------------------------------------------------------------------------------------------------------------------------------------------------------------------------------------------------------------------------------------------------------------------------------------------------------------------------------------------------------|
|                                                                  | In case of absence of internal control signal in sample it is recommended to repeat the assay diluting the sample 1:10 to check for possible problems of inhibition.                                                                                                                                                                                                                                                                                                             |
| <b>REVERSE TRANSCRIPTION</b>                                     |                                                                                                                                                                                                                                                                                                                                                                                                                                                                                  |
| <b>Complete reaction conditions</b>                              |                                                                                                                                                                                                                                                                                                                                                                                                                                                                                  |
| Amount of RNA and reaction volume                                | VIASURE SARS-CoV-2 <i>S gene</i> Real Time PCR Detection Kit (CerTest Biotec): data not provided by the manufacturer (closed molecular platform).<br>Bosphore Novel Coronavirus (2019-nCoV) Detection Kit v1 (Anatolia Geneworks): 10 microliters.<br>Vitassay qPCR SARS-CoV-2 (Vitassay Healthcare S.L.U.): 5 microliters.                                                                                                                                                      |
| Priming oligonucleotide (if using GSP) and concentration         | data not provided by the manufacturer                                                                                                                                                                                                                                                                                                                                                                                                                                            |
| Reverse transcriptase and concentration                          | data not provided by the manufacturer                                                                                                                                                                                                                                                                                                                                                                                                                                            |
| Temperature and time                                             | VIASURE SARS-CoV-2 <i>S gene</i> Real Time PCR Detection Kit (CerTest Biotec): 15 min at 45°C.<br>Bosphore Novel Coronavirus (2019-nCoV) Detection Kit v1 (Anatolia Geneworks): 17 min at 50°C.<br>Vitassay qPCR SARS-CoV-2 (Vitassay Healthcare S.L.U.): 15 min at 45°C.                                                                                                                                                                                                        |
| Manufacturer of reagents and catalogue numbers                   | VIASURE SARS-CoV-2 <i>S gene</i> Real Time PCR Detection Kit (CerTest Biotec): BD REF 444212.<br>Bosphore Novel Coronavirus (2019-nCoV) Detection Kit v1 (Anatolia Geneworks): ABCOW3.<br>Vitassay qPCR SARS-CoV-2 (Vitassay Healthcare S.L.U.): 7081046.                                                                                                                                                                                                                        |
| <b>Cqs with and without RT</b>                                   | not applicable                                                                                                                                                                                                                                                                                                                                                                                                                                                                   |
| <b>Storage conditions of cDNA</b>                                | not applicable                                                                                                                                                                                                                                                                                                                                                                                                                                                                   |
| <b>qPCR TARGET INFORMATION</b>                                   |                                                                                                                                                                                                                                                                                                                                                                                                                                                                                  |
| <b>If multiplex, efficiency and LOD of each assay.</b>           | VIASURE SARS-CoV-2 <i>S gene</i> Real Time PCR Detection Kit (CerTest Biotec): has a detection limit of $\geq 24$ cDNA copies per reaction (cp/rxn) with a positive rate of $\geq 95\%$ .<br>Bosphore Novel Coronavirus (2019-nCoV) Detection Kit v1 (Anatolia Geneworks): has a detection limit of $\geq 18$ cDNA copies per reaction (cp/rxn).<br>Vitassay qPCR SARS-CoV-2 (Vitassay Healthcare S.L.U.): has a detection limit of $\geq 10$ cDNA copies per reaction (cp/rxn). |
| <b>Sequence accession number</b>                                 | data not provided by the manufacturer                                                                                                                                                                                                                                                                                                                                                                                                                                            |
| <b>Location of amplicon</b>                                      |                                                                                                                                                                                                                                                                                                                                                                                                                                                                                  |
| Amplicon length                                                  | data not provided by the manufacturer                                                                                                                                                                                                                                                                                                                                                                                                                                            |
| <i>In silico</i> specificity screen (BLAST, etc)                 | data not provided by the manufacturer                                                                                                                                                                                                                                                                                                                                                                                                                                            |
| Pseudogenes, retropseudogenes or other homologs?                 | not applicable                                                                                                                                                                                                                                                                                                                                                                                                                                                                   |
| Sequence alignment                                               | not applicable                                                                                                                                                                                                                                                                                                                                                                                                                                                                   |
| Secondary structure analysis of amplicon                         | data not provided by the manufacturer                                                                                                                                                                                                                                                                                                                                                                                                                                            |
| <b>Location of each primer by exon or intron (if applicable)</b> | not applicable                                                                                                                                                                                                                                                                                                                                                                                                                                                                   |
| <b>What splice variants are targeted?</b>                        | data not provided by the manufacturer                                                                                                                                                                                                                                                                                                                                                                                                                                            |
| <b>qPCR OLIGONUCLEOTIDES</b>                                     |                                                                                                                                                                                                                                                                                                                                                                                                                                                                                  |
| <b>Primer sequences</b>                                          | data not provided by the manufacturer                                                                                                                                                                                                                                                                                                                                                                                                                                            |

|                                                          |                                                                                                                                                                                                                                                                                                                                                                                                                                                                                           |
|----------------------------------------------------------|-------------------------------------------------------------------------------------------------------------------------------------------------------------------------------------------------------------------------------------------------------------------------------------------------------------------------------------------------------------------------------------------------------------------------------------------------------------------------------------------|
| <b>RTPrimerDB Identification Number</b>                  | data not provided by the manufacturer                                                                                                                                                                                                                                                                                                                                                                                                                                                     |
| <b>Probe sequences</b>                                   | data not provided by the manufacturer                                                                                                                                                                                                                                                                                                                                                                                                                                                     |
| <b>Location and identity of any modifications</b>        | data not provided by the manufacturer                                                                                                                                                                                                                                                                                                                                                                                                                                                     |
| <b>Manufacturer of oligonucleotides</b>                  | data not provided by the manufacturer                                                                                                                                                                                                                                                                                                                                                                                                                                                     |
| <b>Purification method</b>                               | data not provided by the manufacturer                                                                                                                                                                                                                                                                                                                                                                                                                                                     |
| <b>qPCR PROTOCOL</b>                                     |                                                                                                                                                                                                                                                                                                                                                                                                                                                                                           |
| <b>Complete reaction conditions</b>                      |                                                                                                                                                                                                                                                                                                                                                                                                                                                                                           |
| Reaction volume and amount of cDNA/DNA                   | VIASURE SARS-CoV-2 <i>S gene</i> Real Time PCR Detection Kit (CerTest Biotec): data not provided by the manufacturer (automatic method).<br>Bosphore Novel Coronavirus (2019-nCoV) Detection Kit v1 (Anatolia Geneworks): reaction volume - 25 microliters.<br>Vitassay qPCR SARS-CoV-2 (Vitassay Healthcare S.L.U.): reaction volume - 20 microliters.                                                                                                                                   |
| Primer, (probe), Mg++ and dNTP concentrations            | data not provided by the manufacturer                                                                                                                                                                                                                                                                                                                                                                                                                                                     |
| Polymerase identity and concentration                    | data not provided by the manufacturer                                                                                                                                                                                                                                                                                                                                                                                                                                                     |
| Buffer/kit identity and manufacturer                     | data not provided by the manufacturer                                                                                                                                                                                                                                                                                                                                                                                                                                                     |
| Exact chemical constitution of the buffer                | data not provided by the manufacturer                                                                                                                                                                                                                                                                                                                                                                                                                                                     |
| Additives (SYBR Green I, DMSO, etc.)                     | data not provided by the manufacturer                                                                                                                                                                                                                                                                                                                                                                                                                                                     |
| <b>Manufacturer of plates/tubes and catalog number</b>   | BD MAX™ PCR Cartridges (Becton Dickinson, Catalog No. 437519); LightCycler® 480 Multiwell Plate 96, white (Roche, Catalog No. 04729692001); SARS-CoV-2 strips (Catalog No. 7041S046/7042S046).                                                                                                                                                                                                                                                                                            |
| <b>Complete thermocycling parameters</b>                 | VIASURE SARS-CoV-2 <i>S gene</i> Real Time PCR Detection Kit (CerTest Biotec): 2 min at 98°C and 45 cycles, each consisting of 10 sec at 95°C and 58 sec at 60 °C.<br>Bosphore Novel Coronavirus (2019-nCoV) Detection Kit v1 (Anatolia Geneworks): 6 min at 95°C and 38 cycles, each consisting of 15 sec at 97°C and 1 min 10 sec at 55°C.<br>Vitassay qPCR SARS-CoV-2 (Vitassay Healthcare S.L.U.): 2 min at 95°C and 45 cycles, each consisting of 10 sec at 95°C and 50 sec at 60°C. |
| <b>Reaction setup (manual/robotic)</b>                   | VIASURE SARS-CoV-2 <i>S gene</i> Real Time PCR Detection Kit – integrated robotic reaction setup; Bosphore Novel Coronavirus (2019-nCoV) Detection Kit v1 (Anatolia Geneworks) and Vitassay qPCR SARS-CoV-2 (Vitassay Healthcare S.L.U.) – manual reaction setup.                                                                                                                                                                                                                         |
| <b>Manufacturer of qPCR instrument</b>                   | BD MAX™ System (Becton Dickinson); cobas z480 Instrument II (Roche).                                                                                                                                                                                                                                                                                                                                                                                                                      |
| <b>qPCR VALIDATION</b>                                   |                                                                                                                                                                                                                                                                                                                                                                                                                                                                                           |
| <b>Evidence of optimisation (from gradients)</b>         | data not provided by the manufacturer                                                                                                                                                                                                                                                                                                                                                                                                                                                     |
| <b>Specificity (gel, sequence, melt, or digest)</b>      | data not provided by the manufacturer                                                                                                                                                                                                                                                                                                                                                                                                                                                     |
| <b>For SYBR Green I, Cq of the NTC</b>                   | data not provided by the manufacturer                                                                                                                                                                                                                                                                                                                                                                                                                                                     |
| <b>Standard curves with slope and y-intercept</b>        |                                                                                                                                                                                                                                                                                                                                                                                                                                                                                           |
| PCR efficiency calculated from slope                     | not applicable                                                                                                                                                                                                                                                                                                                                                                                                                                                                            |
| Confidence interval for PCR efficiency or standard error | not applicable                                                                                                                                                                                                                                                                                                                                                                                                                                                                            |

|                                                              |                                                                                                                                                                                                                                                                                                                                                                                                                                                                                                                                     |
|--------------------------------------------------------------|-------------------------------------------------------------------------------------------------------------------------------------------------------------------------------------------------------------------------------------------------------------------------------------------------------------------------------------------------------------------------------------------------------------------------------------------------------------------------------------------------------------------------------------|
| r <sup>2</sup> of standard curve                             | not applicable                                                                                                                                                                                                                                                                                                                                                                                                                                                                                                                      |
| <b>Linear dynamic range</b>                                  |                                                                                                                                                                                                                                                                                                                                                                                                                                                                                                                                     |
| Cq variation at lower limit                                  | not applicable                                                                                                                                                                                                                                                                                                                                                                                                                                                                                                                      |
| Confidence intervals throughout range                        | not applicable                                                                                                                                                                                                                                                                                                                                                                                                                                                                                                                      |
| <b>Evidence for limit of detection</b>                       | data not provided by the manufacturer                                                                                                                                                                                                                                                                                                                                                                                                                                                                                               |
| <b>If multiplex, efficiency and LOD of each assay.</b>       | <p>VIASURE SARS-CoV-2 S gene Real Time PCR Detection Kit (CerTest Biotec): has a detection limit of <math>\geq 24</math> cDNA copies per reaction (cp/rxn) with a positive rate of <math>\geq 95\%</math>.</p> <p>Bosphore Novel Coronavirus (2019-nCoV) Detection Kit v1 (Anatolia Geneworks): has a detection limit of <math>\geq 18</math> cDNA copies per reaction (cp/rxn).</p> <p>Vitassay qPCR SARS-CoV-2 (Vitassay Healthcare S.L.U.): has a detection limit of <math>\geq 10</math> cDNA copies per reaction (cp/rxn).</p> |
| <b>DATA ANALYSIS</b>                                         |                                                                                                                                                                                                                                                                                                                                                                                                                                                                                                                                     |
| <b>qPCR analysis program (source, version)</b>               | BD MAX <sup>TM</sup> System Software version: V5.14 A; LightCycler® 480 Software release 1.5.1.62 SP3, Version 1.5.1.62.                                                                                                                                                                                                                                                                                                                                                                                                            |
| Cq method determination                                      | not applicable                                                                                                                                                                                                                                                                                                                                                                                                                                                                                                                      |
| Outlier identification and disposition                       | not applicable                                                                                                                                                                                                                                                                                                                                                                                                                                                                                                                      |
| <b>Results of NTCs</b>                                       | Negative, set in each run of Bosphore Novel Coronavirus (2019-nCoV) Detection Kit v1 (Anatolia Geneworks) and Vitassay qPCR SARS-CoV-2 (Vitassay Healthcare S.L.U.).                                                                                                                                                                                                                                                                                                                                                                |
| <b>Justification of number and choice of reference genes</b> | not applicable                                                                                                                                                                                                                                                                                                                                                                                                                                                                                                                      |
| <b>Description of normalisation method</b>                   | not applicable                                                                                                                                                                                                                                                                                                                                                                                                                                                                                                                      |
| <b>Number and concordance of biological replicates</b>       | not applicable                                                                                                                                                                                                                                                                                                                                                                                                                                                                                                                      |
| <b>Number and stage (RT or qPCR) of technical replicates</b> | not applicable                                                                                                                                                                                                                                                                                                                                                                                                                                                                                                                      |
| <b>Repeatability (intra-assay variation)</b>                 | not applicable                                                                                                                                                                                                                                                                                                                                                                                                                                                                                                                      |
| <b>Reproducibility (inter-assay variation, %CV)</b>          | not applicable                                                                                                                                                                                                                                                                                                                                                                                                                                                                                                                      |
| <b>Power analysis</b>                                        | not applicable                                                                                                                                                                                                                                                                                                                                                                                                                                                                                                                      |
| <b>Statistical methods for result significance</b>           | ABS Quant/Fit Points                                                                                                                                                                                                                                                                                                                                                                                                                                                                                                                |
| <b>Software (source, version)</b>                            | LightCycler® 480 Software release 1.5.1.62 SP3, Version 1.5.1.62                                                                                                                                                                                                                                                                                                                                                                                                                                                                    |
| <b>Cq or raw data submission using RDML</b>                  | not applicable                                                                                                                                                                                                                                                                                                                                                                                                                                                                                                                      |

**Figure S1.** Amplification curves obtained for the SARS-CoV-2 detection using Bosphore Novel Coronavirus kit (2019-nCoV) Detection Kit v1; positive results for six clinical samples (green lines) and positive controls (blue lines) are observed at the corresponding wavelength (A - amplification curves for the *ORF1ab* gene; B - amplification curves for the internal control in the wells detecting the *ORF1ab* gene; C - amplification curves for the *E* gene; D - amplification curves for the internal control in the wells detecting the *E* gene); red curves represent negative controls of the test.

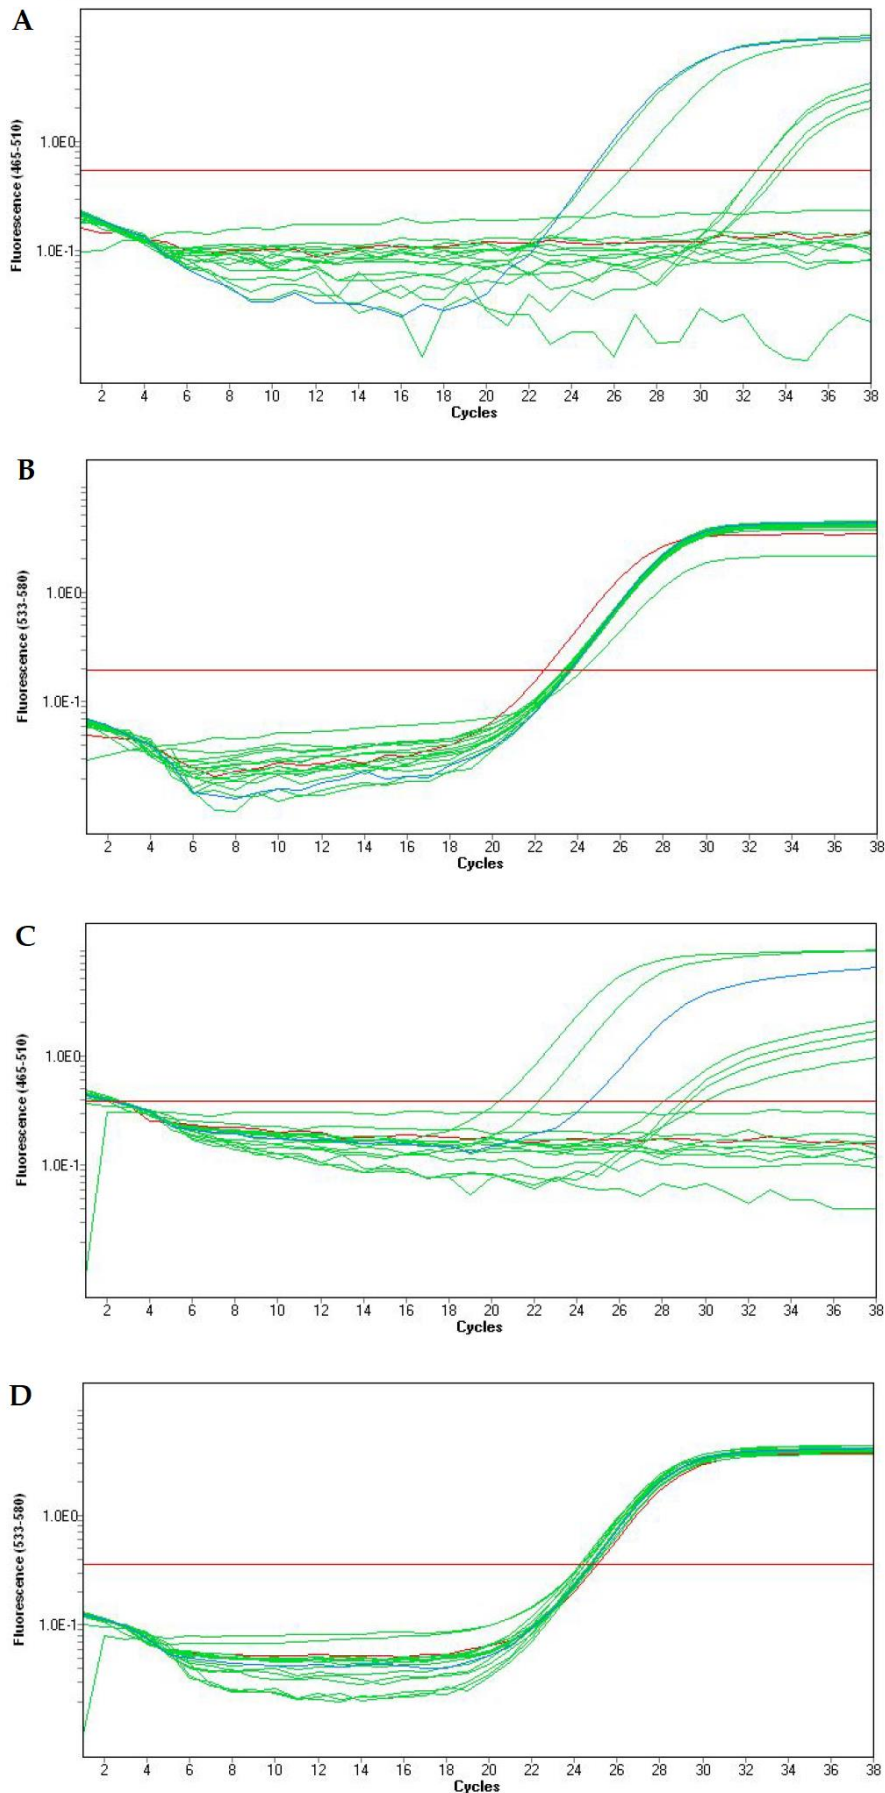



**Figure S2.** Amplification curves obtained for the SARS-CoV-2 detection using Vitassay qPCR SARS-CoV-2; positive results for one clinical sample (green lines) and positive controls (blue lines) are observed at the corresponding wavelength (A - amplification curves for the *ORF1ab* gene; B - amplification curves for the internal control in the wells detecting both *ORF1ab* and *N* genes; C - amplification curves for the *N* gene); red curves represent negative controls of the test.

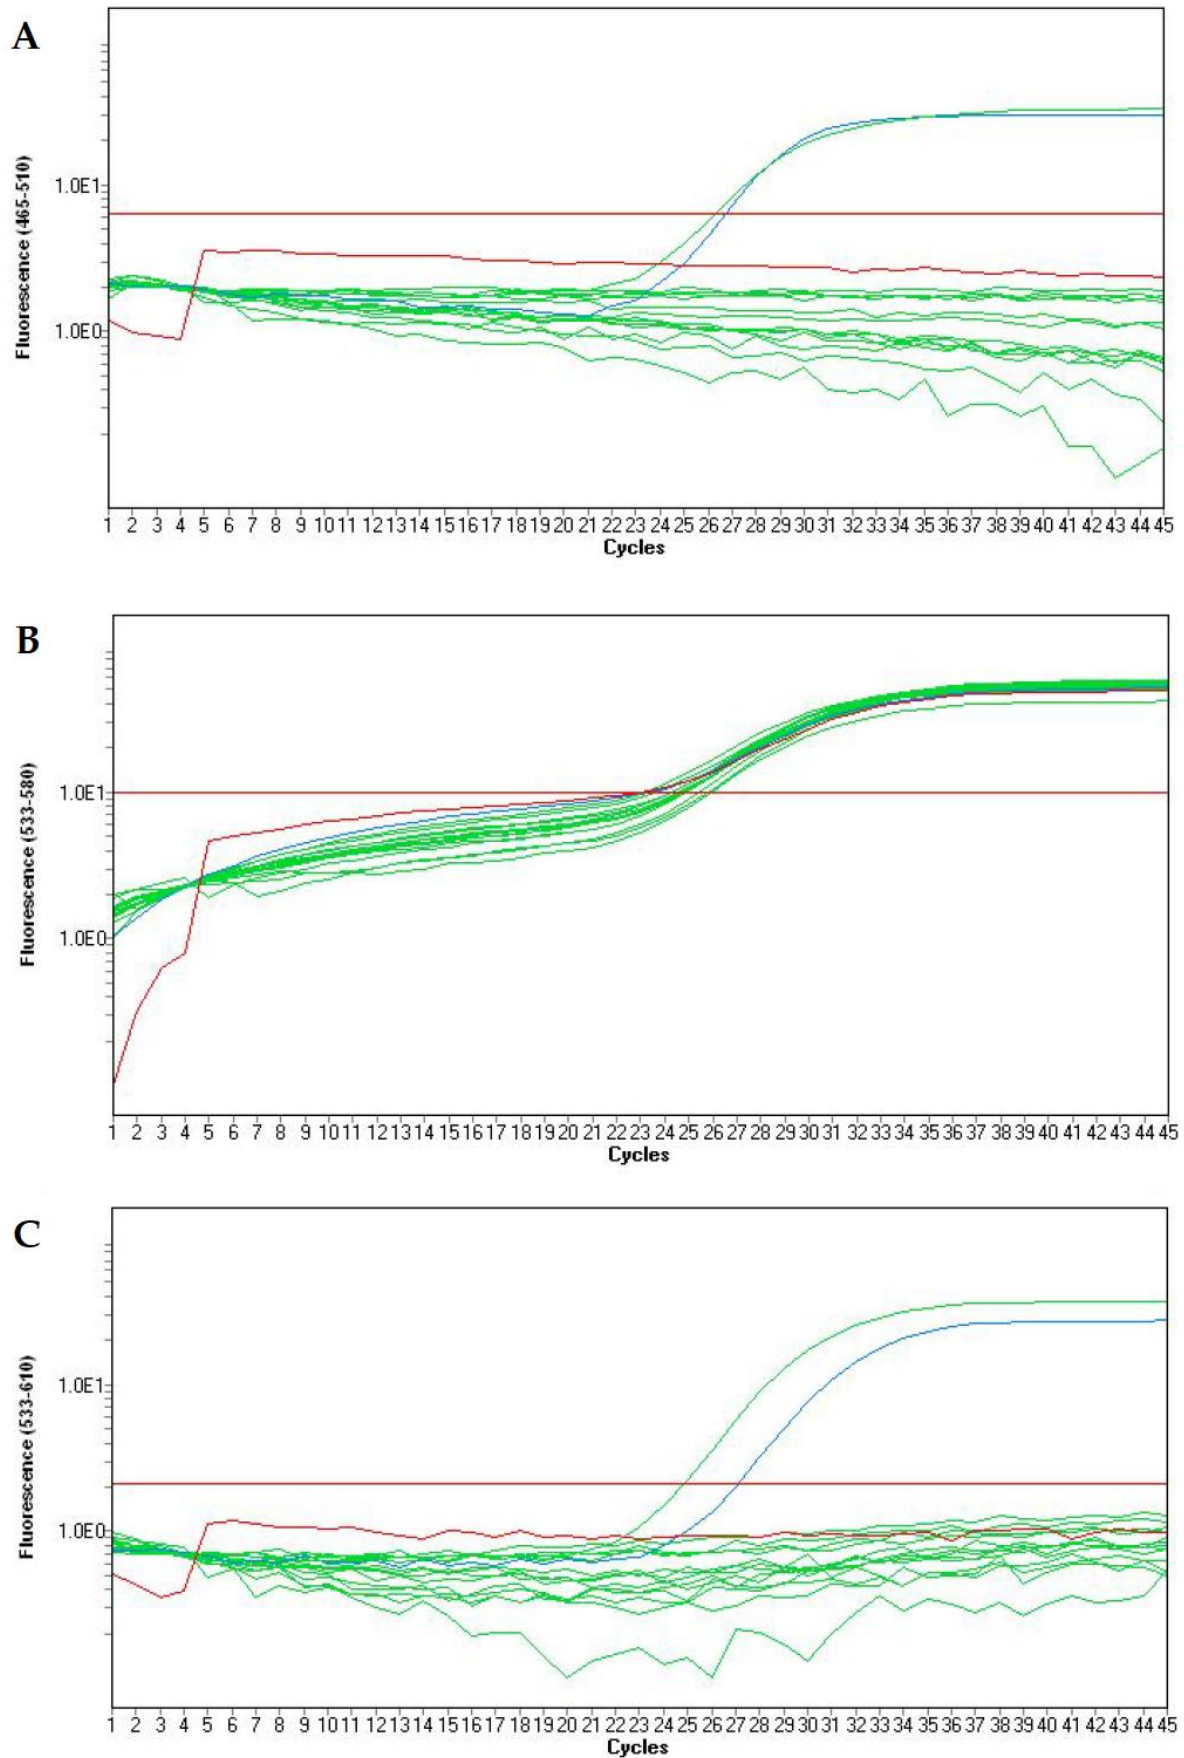

Supplement: s1 [file s1]
